# Supplementary material for: CSF, Blood, and MRI Biomarkers in Skogholt’s Disease—A Rare Neurodegenerative Disease in a Norwegian Kindred
Source: MDPI journal article supplement (doi:10.3390/brainsci13111511), 2023-10-26
Supplement: s1 [file s1]

# SUPPLEMENTARY MATERIAL

**Table S1: MRI scanner system parameters and number of scans**

| Scanner system                                                           | 3D T1-weighted sequence parameters                                                                                                                                                                     | 3D FLAIR sequence parameters                                                                           | Number of patients scanned |
|--------------------------------------------------------------------------|--------------------------------------------------------------------------------------------------------------------------------------------------------------------------------------------------------|--------------------------------------------------------------------------------------------------------|----------------------------|
| Siemens Avanto 1.5T<br>(Siemens Medical Solutions, Erlangen, Germany)    | Magnetization-prepared rapid gradient-echo sequence<br>TR/TE/TI = 1700/2.42/1000 ms; FA = 15°<br>matrix = 256 × 256; 144 slices<br>slice thickness = 1.2 mm<br>in-plane resolution = 1 mm <sup>2</sup> | TR/TE/TI = 6000/363/2200 ms<br>slice thickness = 1.2 mm<br>in-plane resolution = 1.2 mm × 1.2 mm       | 10<br>3                    |
| Siemens Skyra 3T<br>(Siemens Medical Solutions, Erlangen, Germany)       | Magnetization-prepared rapid gradient-echo sequence<br>TR/TE/TI = 2300/2.98/900 ms; FA = 9°<br>matrix = 256 × 256; 176 slices<br>slice thickness = 1.2 mm<br>in-plane resolution = 1 mm <sup>2</sup>   | TR/TE/TI = 5000/394/1800 ms<br>slice thickness = 1.2 mm<br>in-plane resolution = 1 mm <sup>2</sup>     | 3                          |
| Philips Ingenia 3T<br>(Philips Medical Systems, Best, the Netherlands)   | Turbo field echo sequence<br>TR/TE/TI = 4.7/2.3/853 ms; FA = 8°<br>matrix = 256 × 256; 184 slices,<br>slice thickness = 2.0 mm<br>in-plane resolution = 1 mm <sup>2</sup>                              | TR/TE/TI = 4800/320/1650 ms<br>slice thickness = 2.0 mm<br>in-plane resolution = 1 mm <sup>2</sup>     | 10                         |
| Philips Achieva 1.5T<br>(Philips Medical Systems, Best, the Netherlands) | Fast Field Echo<br>TR/TE/TI = 7.2 ms / 3.3 ms / without SPIR; FA = 8°<br>matrix = 256 × 232; 160 slices<br>slice thickness = 1 mm<br>in-plane resolution = 1 mm <sup>2</sup>                           | TR/TE/TI = 4800/313/1660 ms<br>slice thickness = 1.52 mm<br>in-plane resolution = 1.10 mm <sup>2</sup> | 11                         |
| Philips Achieva 3T<br>(Philips Medical Systems, Best, the Netherlands)   | Turbo field echo sequence<br>TR/TE/TI = 6.7/3.1/853 ms; FA = 8°<br>matrix = 256 × 256; 170 slices<br>slice thickness = 1.2 mm<br>in-plane resolution = 1 mm <sup>2</sup>                               | TR/TE/TI = 8000/418/2400 ms<br>slice thickness = 1.2 mm<br>in-plane resolution = 1 mm <sup>2</sup>     | 17                         |
| Philips Ingenia 1.5T<br>(Philips Medical Systems, Best, the Netherlands) | Turbo field echo sequence<br>TR/TE/TI = 7.55/3.43/930 ms; FA = 8°<br>matrix = 256 × 256; 157 slices<br>slice thickness = 1.0 mm<br>in-plane resolution = 1 mm <sup>2</sup>                             | TR/TE/TI = 4800/356/1660 ms<br>slice thickness = 1.2 mm<br>in-plane resolution = 1 mm <sup>2</sup>     | 9                          |
| GE Optima 1.5 T<br>(GE Healthcare, Chicago, IL)                          | Fast spoiled gradient-echo sequence<br>TR/TE/TI = 11.3/5.04/500 ms; FA = 10°<br>matrix = 256 × 256; 156 slices<br>slice thickness = 1.2 mm<br>in-plane resolution = 1 mm <sup>2</sup>                  | TR/TE/TI = 6000/135.6/1840 ms<br>slice thickness = 1.2 mm<br>in-plane resolution = 1 mm <sup>2</sup>   | 6                          |
| Siemens Prisma 3.0T                                                      | Magnetization-prepared rapid gradient-echo sequence                                                                                                                                                    | TR/TE/TI = 2200/1.47/900 ms; FA = 8°<br>matrix = 256 × 256; 320 slices<br>slice thickness = 1 mm       | 2                          |

---

in-plane resolution = 1 mm<sup>2</sup>

---

Locations: Oslo University Hospital (OUS); Stord Hospital; Aleris Helse, Oslo, private health enterprise; Innlandet Hospital Trust (Lillehammer); Stavanger university hospital (SUS); University Hospital of North Norway (UNN); Haraldsplass Diaconal Hospital (HDS)

**Table S2: Cortical thickness.** Cerebral MRI measurements of cortical thickness (mm).

| Cortical region of interest | Skogholt<br><i>n</i> = 11 | MRI-Control<br><i>n</i> = 60 | <i>p</i> -value |
|-----------------------------|---------------------------|------------------------------|-----------------|
| Supramarginal               | 2.52 (2.43, 2.57)         | 2.27 (2.14, 2.35)            | <0.001          |
| Lingual                     | 2.08 (2.04, 2.17)         | 1.91 (1.81, 1.97)            | <0.001          |
| Cuneus                      | 1.95 (1.92, 1.99)         | 1.79 (1.65, 1.84)            | <0.001          |
| Superior parietal           | 2.15 (2.06, 2.18)         | 1.94 (1.83, 1.99)            | <0.001          |
| Postcentral                 | 2.05 (2.00, 2.12)         | 1.83 (1.74, 1.89)            | <0.001          |
| Mean cortical thickness     | 2.40 (2.36, 2.48)         | 2.24 (2.17, 2.32)            | <0.001          |
| Inferior parietal           | 2.40 (2.32, 2.47)         | 2.22 (2.10, 2.30)            | <0.001          |
| Lateral occipital           | 2.18 (2.12, 2.24)         | 1.99 (1.90, 2.11)            | <0.001          |
| Superior temporal           | 2.83 (2.75, 2.87)         | 2.67 (2.52, 2.75)            | <0.001          |
| Rostral middle frontal      | 2.29 (2.23, 2.39)         | 2.12 (1.98, 2.21)            | <0.001          |
| Caudal middle frontal       | 2.41 (2.32, 2.47)         | 2.24 (2.07, 2.33)            | 0.001           |
| Pars triangularis           | 2.34 (2.30, 2.39)         | 2.16 (2.05, 2.29)            | 0.001           |
| Posterior cingulate         | 2.46 (2.35, 2.50)         | 2.29 (2.21, 2.37)            | 0.001           |
| Pars opercularis            | 2.48 (2.41, 2.52)         | 2.30 (2.19, 2.43)            | 0.001           |
| Superior frontal            | 2.50 (2.43, 2.56)         | 2.35 (2.20, 2.43)            | 0.002           |
| Middle temporal             | 2.74 (2.69, 2.75)         | 2.61 (2.49, 2.67)            | 0.002           |
| Precuneus                   | 2.33 (2.29, 2.35)         | 2.20 (2.09, 2.27)            | 0.002           |
| Transverse temporal         | 2.34 (2.29, 2.46)         | 2.10 (1.96, 2.29)            | 0.003           |
| Paracentral                 | 2.29 (2.22, 2.36)         | 2.15 (2.04, 2.27)            | 0.004           |
| Inferior temporal           | 2.76 (2.71, 2.87)         | 2.65 (2.52, 2.76)            | 0.007           |
| Pars orbitalis              | 2.58 (2.48, 2.62)         | 2.38 (2.24, 2.53)            | 0.009           |
| Caudal anterior cingulate   | 2.49 (2.40, 2.61)         | 2.33 (2.23, 2.49)            | 0.011           |
| Pericalcarine               | 1.64 (1.52, 1.69)         | 1.52 (1.38, 1.60)            | 0.014           |
| Medial orbitofrontal        | 2.44 (2.29, 2.50)         | 2.29 (2.20, 2.40)            | 0.027           |
| Fusiform                    | 2.68 (2.57, 2.74)         | 2.57 (2.48, 2.66)            | 0.031           |
| Rostral anterior cingulate  | 2.70 (2.64, 2.96)         | 2.60 (2.42, 2.73)            | 0.038           |
| Parahippocampal             | 2.88 (2.78, 2.92)         | 2.78 (2.58, 2.90)            | 0.11            |
| Insula                      | 3.01 (2.95, 3.12)         | 2.93 (2.79, 3.04)            | 0.13            |
| Precentral                  | 2.37 (2.27, 2.42)         | 2.26 (2.09, 2.39)            | 0.14            |
| Lateral orbitofrontal       | 2.45 (2.43, 2.55)         | 2.42 (2.29, 2.51)            | 0.2             |
| Isthmus cingulate           | 2.17 (2.11, 2.31)         | 2.26 (2.16, 2.35)            | 0.3             |
| Entorhinal                  | 3.41 (3.26, 3.60)         | 3.46 (3.26, 3.64)            | 0.8             |

Statistics presented: Median (IQR) with *p*-values from Wilcoxon rank sum tests.

**Table S3: Region of interest volumes. Cerebral MRI volumetry**

| Structure                          | <u>Skogholt</u><br><i>n</i> = 11 | <u>MRI-Control</u><br><i>n</i> = 60 | <i>p</i> -value |
|------------------------------------|----------------------------------|-------------------------------------|-----------------|
| Choroid-plexus (ml)                | 0.91 (0.80, 1.04)                | 1.51 (1.28, 1.95)                   | <0.001          |
| Cerebellum-White-Matter (ml)       | 22.6 (17.7, 25.9)                | 29.0 (25.9, 32.1)                   | <0.001          |
| CerebralWhiteMatter (ml)           | 382 (326, 455)                   | 493 (459, 530)                      | 0.001           |
| Ventricles (ml)                    | 17 (13, 22)                      | 32 (19, 42)                         | 0.001           |
| Caudate (ml)                       | 7.64 (7.21, 8.09)                | 6.56 (6.00, 7.15)                   | 0.001           |
| White matter hypointensities (ml)  | 8.53 (2.23, 10.09)               | 1.71 (1.33, 2.80)                   | 0.002           |
| White matter hyperintensities (ml) | 13.7 (3.3, 17.2)                 | 2.3 (1.0, 4.7)*                     | 0.002           |
| Surface holes (μl)                 | 96 (48, 126)                     | 35 (17, 79)                         | 0.009           |
| ICV (L)                            | 1.37 (1.31, 1.55)                | 1.57 (1.42, 1.70)                   | 0.01            |
| Pallidum (ml)                      | 3.14 (2.98, 3.83)                | 3.81 (3.44, 4.16)                   | 0.03            |
| VentralDC (ml)                     | 7.44 (6.64, 8.46)                | 8.23 (7.67, 8.92)                   | 0.044           |
| Brain stem (ml)                    | 20.45 (19.03, 22.26)             | 21.88 (20.04, 23.67)                | 0.13            |
| Cortex (ml)                        | 437 (422, 490)                   | 418 (393, 448)                      | 0.13            |
| Accumbens-area (ml)                | 1.19 (0.99, 1.32)                | 1.04 (0.92, 1.22)                   | 0.2             |
| Cerebellum Cortex (ml)             | 96 (92, 114)                     | 106 (97, 113)                       | 0.4             |
| Thalamus Proper (ml)               | 12.34 (11.39, 14.12)             | 13.01 (11.86, 14.49)                | 0.4             |
| Putamen (ml)                       | 9.01 (8.54, 10.40)               | 9.00 (8.35, 9.74)                   | 0.4             |
| Corpus Callosum (ml)               | 3.62 (3.29, 4.16)                | 3.88 (3.41, 4.26)                   | 0.5             |
| Total Gray matter (ml)             | 596 (558, 664)                   | 577 (539, 620)                      | 0.5             |
| Hippocampus (ml)                   | 7.14 (6.96, 8.30)                | 7.77 (7.23, 8.13)                   | 0.5             |
| Amygdala (ml)                      | 3.32 (2.86, 3.96)                | 3.40 (3.11, 3.79)                   | 0.6             |
| Subcortical gray matter (ml)       | 51.6 (49.1, 59.6)                | 54.7 (50.3, 57.9)                   | 0.7             |

Statistics presented: Median (IQR) with p-values from Wilcoxon rank sum tests. \**n*=56

**Figure S1.** Violin plots with individual CSF biomarker datapoints

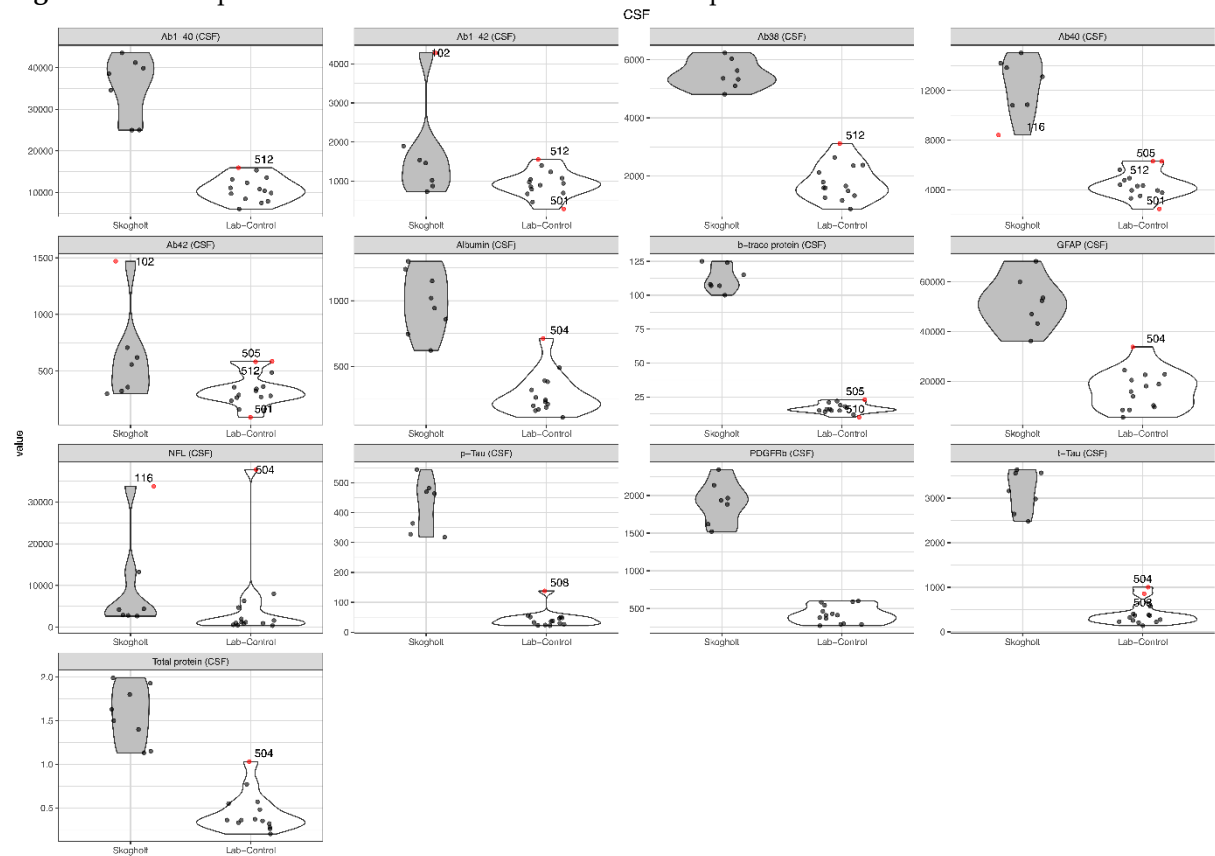

**Figure S1.** Violin plots with individual datapoints for raw unadjusted values of all measured CSF markers. Red datapoints are extreme values.
